# Supplementary material
Source: ML conference proceedings conference paper supplement (https://openaccess.thecvf.com/content/CVPR2026/html/Luo_GROW_Watermark_Generation_CVPR_2026_paper.html)
Supplement: Supplementary file 1 [file Luo_GROW_Watermark_Generation_CVPR_2026_supplemental.pdf]

# GROW: Watermark Generation with Progressive Guidance for Diffusion Models

## Supplementary Material

### 001 1. Analysis of Watermarking Paradigms

#### 002 1.1. Difference from Tree-Ring based Watermark

003 To understand the core innovation of GROW, it is essen-  
004 tial to analyze its fundamental difference from the domi-  
005 nant training-free paradigm, exemplified by Tree-Ring [4].  
006 While both methods achieve a robust, semantic fusion of  
007 the watermark with the image content, they do so through  
008 starkly contrasting mechanisms: passive scattering versus  
009 active guidance.

**Tree-Ring based: Passive Scattering.** The Tree-Ring methodology begins by embedding a watermark signal  $\mathbf{W}$  into the initial noise latent, creating a modified starting point  $\mathbf{z}'_T = \mathbf{z}_T + \mathbf{W}$ . The standard denoising process then commences. Conceptually, the total initial noise  $\mathbf{z}'_T$  is progressively consumed to produce the final clean latent  $\mathbf{z}'_0$  and a series of predicted noises  $\{\mathcal{E}'_t\}$ :

$$\mathbf{z}'_T = \mathbf{z}'_0 + \sum_{t=1}^T \mathcal{E}'_t$$

As the denoising process unfolds, this initial signal  $\mathbf{W}$  is inevitably distributed among all resulting components:

$$\mathbf{z}'_T = (\mathbf{z}_0 + \mathbf{w}_0) + \sum_{t=1}^T (\mathcal{E}_t + \mathbf{w}_t)$$

010 A portion, let's call it  $\mathbf{w}_0$ , remains in the final clean latent,  
011 while other portions  $\{\mathbf{w}_t\}$  are "subtracted away" as parts  
012 of the predicted noise at each step. As the Tree-Ring paper  
013 notes, the watermark becomes "semantically hidden in the  
014 image space." This implies that the surviving portion  $\mathbf{w}_0$   
015 is one that aligns with the image's content (i.e., it is "se-  
016 mantically plausible"). The diffusion model, in its effort  
017 to generate a coherent image, naturally filters out parts of  
018  $\mathbf{W}$  that are inconsistent with the emerging semantics, while  
019 retaining and integrating the parts that are.

020 This process can be viewed as a form of passive filter-  
021 ing. The final embedded watermark  $\mathbf{w}_0$  is a byproduct of  
022 the denoising process, an unknown and context-dependent  
023 fraction of the original signal  $\mathbf{W}$ . Consequently, detecting  
024 the watermark directly from the final image latent  $\mathbf{z}'_0$  is im-  
025 possible, as one only has access to the "surviving" fraction  
026  $\mathbf{w}_0$ . To verify the watermark, one must recover an estimate  
027 of the entire initial latent  $\mathbf{z}'_T$  to check for the presence of  
028 the complete original signal  $\mathbf{W}$ . This necessitates a costly  
029 inversion process, which is the primary bottleneck of this  
030 paradigm.

**GROW: Active Guidance.** GROW operates on the re- 031  
verse principle. Instead of passively scattering an initial 032  
signal, we actively guide the generation process towards a 033  
fixed, predefined watermark target  $\mathbf{S}$  that is intended for the 034  
final clean latent  $\mathbf{z}_0$ . This is achieved by reformulating the 035  
watermarking task as an optimization problem that is solved 036  
concurrently with image generation. 037

At each guided denoising step, we introduce a watermark loss,  $\mathcal{L}_{wm} = \text{Loss}(\text{DCT}(\hat{\mathbf{z}}_0), \mathbf{S})$ , where  $\hat{\mathbf{z}}_0$  is the predicted clean latent at that step. This loss is balanced against the model's primary objective of matching the text condition  $c$ . The final noise prediction  $\mathcal{E}^{\text{final}}$  becomes a weighted combination that harmonizes these two competing goals:

$$\mathcal{E}^{\text{final}} \propto (\text{guidance towards } c) + \eta \cdot (\text{guidance towards } \mathbf{S})$$

The U-Net is thus tasked with finding a generation path 038  
that minimizes both objectives simultaneously. It must pro- 039  
duce an image that is not only semantically consistent with 040  
the prompt but also structurally embeds the target water- 041  
mark  $\mathbf{S}$ . The watermark is not a leftover artifact; it is an 042  
active, explicit constraint that the model must accommo- 043  
date throughout the generation. This active optimization 044  
forces the model to find a harmonious solution, weaving 045  
the frequency-domain watermark signal into plausible im- 046  
age textures in a manner consistent with its learned priors. 047

#### 1.2. The Advantage of Active Guidance 048

This analysis reveals a crucial insight: GROW retains the 049  
key advantage of methods like Tree-Ring: the final water- 050  
mark signal is deeply and robustly fused with the image 051  
content because it is generated in a way that is consistent 052  
with the image's semantics. The difference, and GROW's 053  
core contribution, lies in the mechanism. 054

In Tree-Ring, this semantic fusion is a passive byproduct 055  
of the denoising process filtering a watermarked noise. The 056  
model is unaware of the watermarking goal; it simply per- 057  
forms its denoising task, and the robust embedding happens 058  
as a consequence. 059

In GROW, the fusion is the result of an active optimiza- 060  
tion. The model is explicitly guided to find a solution that 061  
satisfies both the content and watermark objectives. By re- 062  
formulating the problem from passive scattering to active 063  
guidance, GROW achieves the same desirable fusion of wa- 064  
termark and content, but with a significant practical advan- 065  
tage: the watermark target  $\mathbf{S}$  is known and fixed, making 066  
extraction direct, efficient, and completely free of any inver- 067  
sion process. This shift in mechanism from passive to active 068

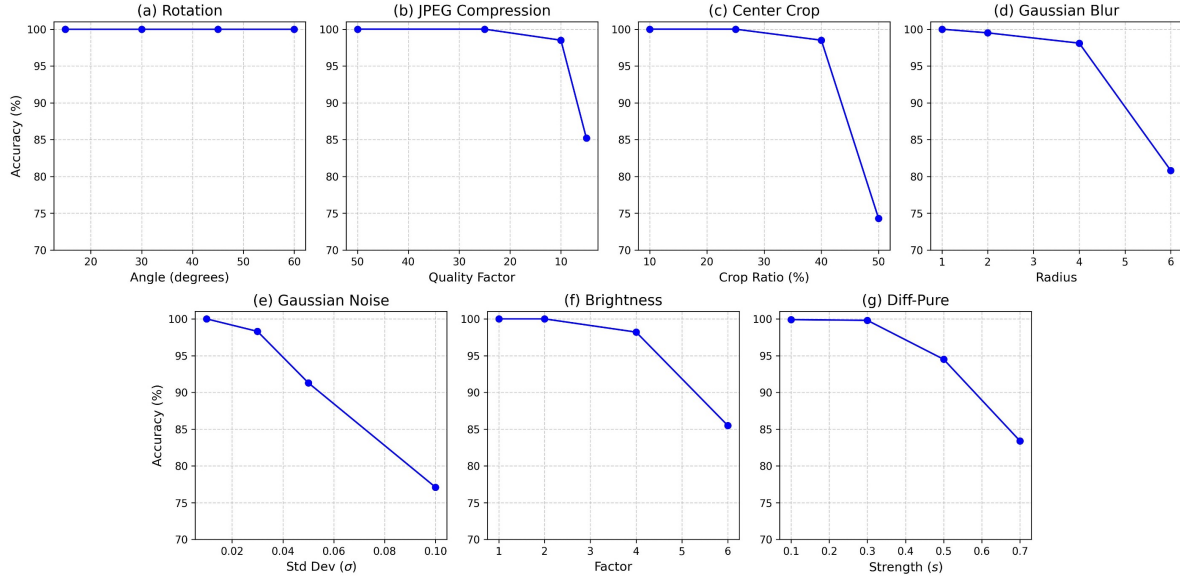

Figure 1. Robustness of GROW under varying attack intensities. Each plot displays the average extraction accuracy on images generated from the MS-COCO and Stable Diffusion Prompts datasets.

069 is what unlocks the dramatic gains in extraction speed while  
070 preserving the high robustness intrinsic to in-generation wa-  
071 termarking methods.

## 072 2. Additional Experiments

### 073 2.1. Varying Attack Strength

074 To provide a more nuanced understanding of GROW’s ro-  
075 bustness, we analyze its performance under varying intensi-  
076 ties of common attacks. As illustrated in Figure 1, GROW  
077 demonstrates remarkable resilience across a wide range of  
078 distortions. This section further clarifies the mechanisms  
079 behind this strong performance, particularly concerning ge-  
080 ometric attacks, and reconciles these results with the limi-  
081 tations discussed in the main paper.

082 **Robustness to JPEG Compression.** As shown in Fig-  
083 ure 1(b), GROW maintains near-perfect Message Accuracy  
084 (M-ACC) even under severe JPEG compression (e.g., qual-  
085 ity factor of 10). This exceptional robustness stems from  
086 our design choice to embed the watermark in the VAE’s la-  
087 tent space ( $z_0$ ). The VAE encoder is trained to be robust  
088 to common image corruptions, effectively filtering out com-  
089 pression artifacts and preserving the core semantic informa-  
090 tion along with our embedded watermark signal in its latent  
091 representation.

092 **Synchronized Extraction for Geometric Attacks.** The  
093 apparent contradiction between the high M-ACC against ro-  
094 tation and cropping in Table ?? and the stated sensitivity to  
095 geometric transformations in our Limitations section is re-  
096 solved by our extraction strategy. For practical applications,  
097 watermark extraction is not a passive, one-shot process. In-

stead, we employ a **synchronized extraction** mechanism  
that actively searches for the watermark under a set of ex-  
pected transformations.

098 **For Rotation:** Our extractor iterates through a pre-  
099 defined set of rotation angles (e.g., every 15 degrees from -90  
100 to +90). At each angle, it attempts to extract the water-  
101 mark and calculates a confidence score based on the consis-  
102 tency of the repeated bits. The final extracted message  
103 is the one corresponding to the angle with the highest con-  
104 fidence score. This search-based approach effectively syn-  
105 chronizes the extractor with the orientation of the attacked  
106 image, allowing for perfect M-ACC as long as the rotation  
107 falls within the tested range. The small angular gap like 1  
108 degree between our test attacks and the detection angles is  
109 easily tolerated by the robustness of the embedded signal.  
110  
111  
112

113 **For Cropping:** A similar search strategy is applied.  
114 As our experiments show, this method can tolerate random  
115 cropping of up to 0.4 of the image area while maintaining  
116 high M-ACC.

117 **Reconciling Robustness with Limitations.** While  
118 highly effective, this synchronized detection is inherently  
119 slower than a direct extraction and is limited to a pre-  
120 defined set of transformations. It cannot, for example, han-  
121 dle arbitrary, non-rigid warping or unconstrained random  
122 ratio stretching. This is because such distortions disrupt  
123 the structural relationships of DCT coefficients, which are  
124 critical for watermark decoding. This is the fundamen-  
125 tal challenge for training-free methods operating in a fixed  
126 domain, and it motivates our future work on a learnable,  
127 transformation-invariant representation space. In summary,

Table 1. Impact of watermark capacity on image quality (FID) and robustness (Avg. M-ACC) on MS-COCO Dataset.

| Capacity (bits) | FID ↓ | Avg. M-ACC ↑ |
|-----------------|-------|--------------|
| 16              | 12.32 | 0.976        |
| 32              | 18.15 | 0.953        |
| 64              | 25.59 | 0.872        |

our reported high M-ACC is a testament to a practical and effective extraction system, while our stated limitation acknowledges the inherent theoretical constraints of the DCT watermark structure.

## 2.2. Watermark Capacity

We investigate the trade-off between watermark capacity and performance by testing GROW with 16, 32, and 64 bit payloads. As presented in Table 1, increasing the capacity necessitates a stronger watermark signal, which predictably leads to a measurable degradation in both image quality (higher FID) and robustness (lower M-ACC). This performance drop highlights a core limitation of operating within a fixed domain like DCT: as more frequency coefficients are utilized to carry information, the watermark becomes more intrusive and simultaneously more vulnerable to being overwritten by image content or attacks.

his experiment underscores the inherent constraints of its training-free nature. As discussed in our Limitations section, a promising future direction is to replace the static DCT space with a learnable representation, which could potentially support higher capacities with less impact on quality and robustness. This study validates the flexibility of our current framework while also motivating the exploration of such hybrid approaches.

## 2.3. Verification Experiment

Beyond full message extraction, a crucial real-world application is verification: a binary classification task to determine if an image contains a watermark or not. This is often simpler and faster than extracting the entire message. To evaluate GROW’s performance on this task, we conduct a comprehensive verification experiment.

Our verification method leverages the confidence score derived from the redundancy of embedded bits. During extraction, each bit of the message is embedded multiple times. The detector performs a majority vote for each bit and calculates a bit consistency score: the percentage of repeated bits that match the majority vote. The average consistency across all message bits serves as our final confidence score. A predefined threshold is applied to this score: if the confidence is above the threshold, the image is classified as “watermarked”; otherwise, it is “non-watermarked.”

We evaluated the verification performance on 1,000 wa-

Table 2. Verification performance (TPR@1%FPR) under various attacks on the MS-COCO dataset. The threshold for each attack is dynamically set to achieve an FPR of approximately 1% on 1,000 non-watermarked images.

| Attack Type    | TPR (@1% FPR) |
|----------------|---------------|
| Clean          | 100.0%        |
| Rotation       | 99.9%         |
| JPEG           | 100.0%        |
| Crop           | 99.5%         |
| Blur           | 100.0%        |
| Noise          | 99.7%         |
| Brightness     | 99.8%         |
| <b>Average</b> | <b>99.8%</b>  |

termarked and 1,000 non-watermarked images from the MS-COCO dataset, under the same set of attacks used in our main robustness experiments. To ensure a fair and stringent evaluation, we report the True Positive Rate at a False Positive Rate of approximately 1% (TPR@1%FPR). As summarized in Table 2, GROW demonstrates exceptional performance. It achieves an average TPR of 99.8% across all attacks, indicating that it can reliably verify watermarked images even after distortions, while maintaining an extremely low false alarm rate. This high level of reliability and robustness makes GROW suitable for practical deployment.

## 2.4. Additional Visual Results

To further showcase visual quality and generality, Figure 2 presents results on diverse datasets, including MS-COCO [2], WikiArt [3], and Stable Diffusion prompts [1]. The watermarked images are imperceptible, demonstrating that our method preserves image fidelity across varied subjects and styles.

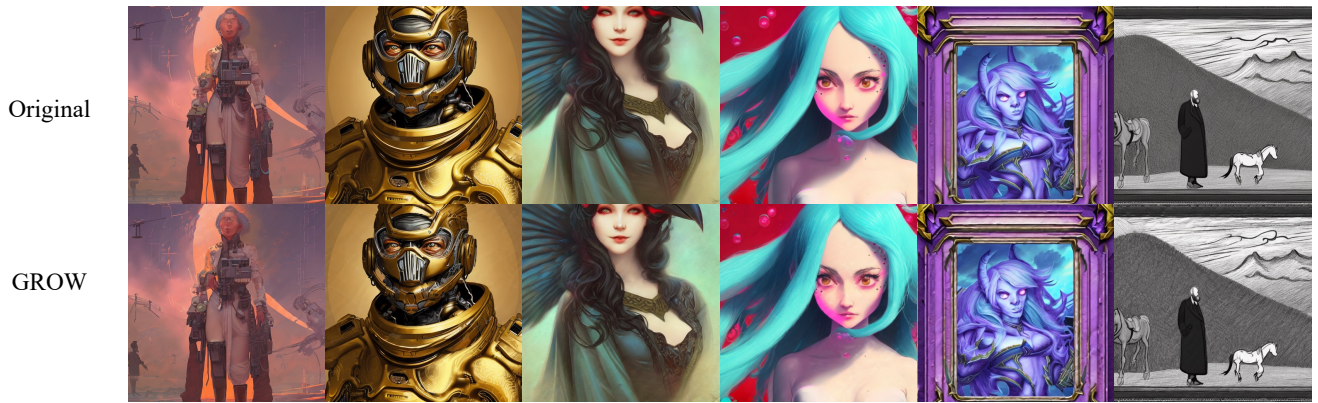

(a) Stable Diffusion prompts

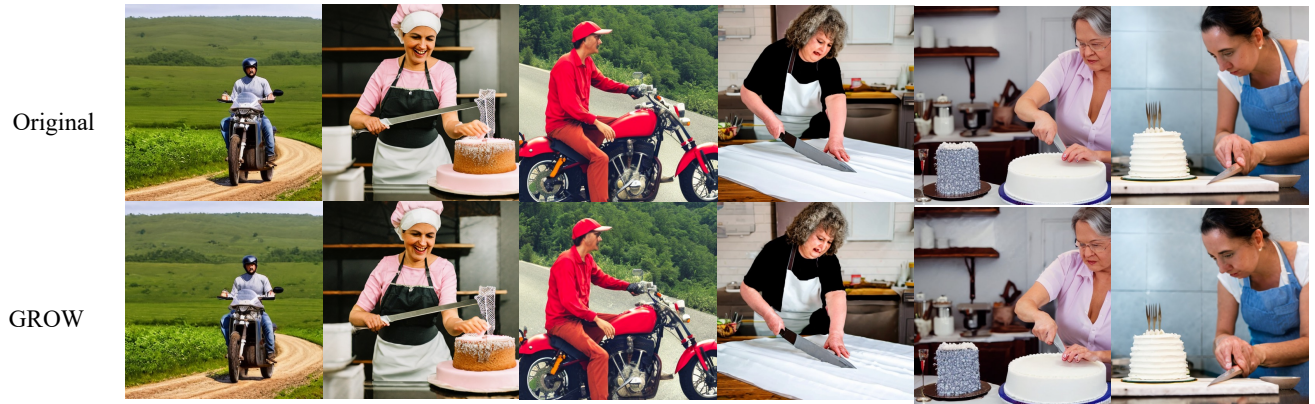

(b) MS-COCO

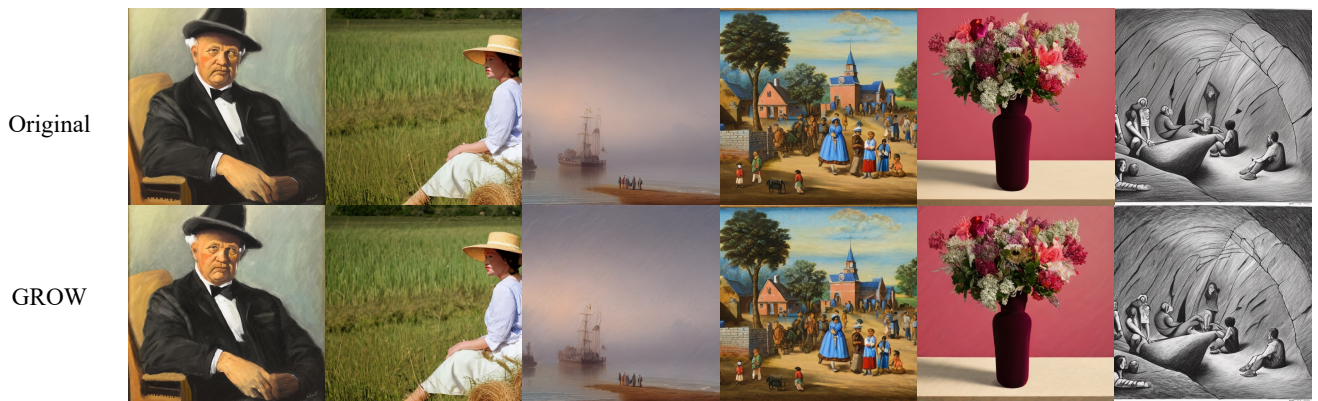

(c) WikiArt

Figure 2. Additional qualitative results of watermarked images generated by GROW on diverse datasets. The visual quality is consistently high, and the watermark is imperceptible.

189

**References**

190

[1] Gustavosta. Stable-diffusion-prompts. <https://huggingface.co/datasets/Gustavosta/Stable-Diffusion-Prompts>, 2024. 3

191

192

193

194

195

196

197

[2] Tsung-Yi Lin, Michael Maire, Serge Belongie, James Hays, Pietro Perona, Deva Ramanan, Piotr Dollár, and C Lawrence Zitnick. Microsoft coco: Common objects in context. In *European conference on computer vision*, pages 740–755. Springer, 2014. 3

198

199

200

201

[3] Wei Ren Tan, Chee Seng Chan, Hernan E Aguirre, and Kiyoshi Tanaka. Improved artgan for conditional synthesis of natural image and artwork. *IEEE Transactions on Image Processing*, 28(1):394–409, 2018. 3

202

203

204

205

[4] Yuxin Wen, John Kirchenbauer, Jonas Geiping, and Tom Goldstein. Tree-ring watermarks: Fingerprints for diffusion images that are invisible and robust. *arXiv preprint arXiv:2305.20030*, 2023. 1
